# Supplementary material for: Bio-inspired synthesis of PEGylated polypyrrole@polydopamine nanocomposites as theranostic agents for T1-weighted MR imaging guided photothermal therapy
Source: Royal Society of Chemistry journal article supplement (doi:10.1039/c6tb02740g), 2016-12-29
Supplement: c6tb02740g1.pdf [file c6tb02740g1.pdf]

## Bio-inspired synthesis of PEGylated Polypyrrole@Polydopamine Nanocomposite as Theranostic agent for T<sub>1</sub>-Weighted MR imaging guided Photothermal Therapy

Zhe Yang,<sup>‡a</sup> Jinghua Ren,<sup>‡b</sup> Zhilan Ye,<sup>b</sup> We Zhu,<sup>a</sup> Liji Xiao,<sup>a</sup> Li Zhang,<sup>a</sup> Qianyuan He,<sup>a</sup> Zushun Xu,<sup>\*a</sup> and Haibo Xu<sup>\*c</sup>

*a. Hubei Collaborative Innovation Center for Advanced Organic Chemical Materials; Ministry of Education Key Laboratory for the Green Preparation and Application of Functional Materials, Hubei University, Wuhan, Hubei 430062, China. \*E-mail: zushunxu@hubu.edu.cn Tel.: +852 34427724; fax: +852 34420542.*

*b. Cancer centre, Union Hospital, Tongji Medical College of Huazhong University of Science and Technology, Wuhan, Hubei 430030, China.*

*c. Department of Radiology, Union Hospital, Tongji Medical College of Huazhong University of Science and Technology, Wuhan, Hubei 430030, China. \* E-mail: xuhaibo1120@hotmail.com Tel.: +86 27 85726410; fax: +86 27 85726919.*

<sup>‡</sup> These authors have contributed equally.

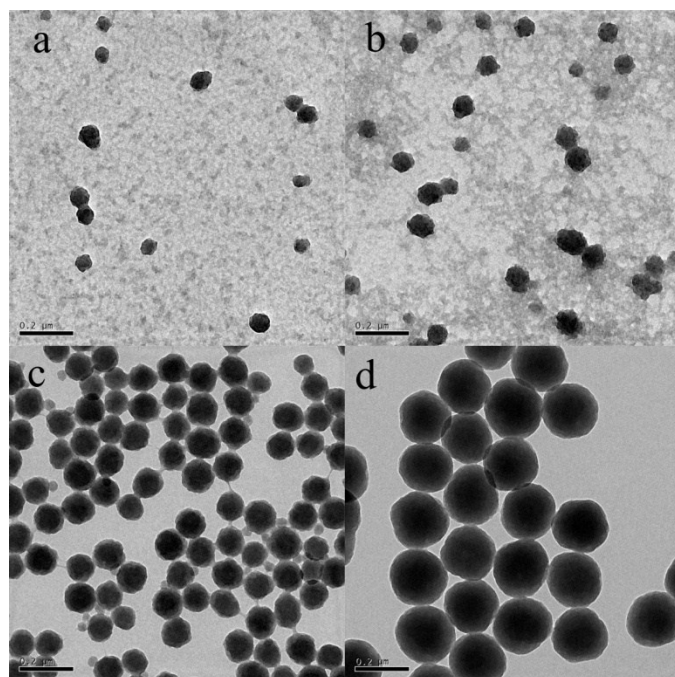

Fig. S1 TEM images of PPDE synthesized with different dose of dopamine, (a) dopamine:PPys = 1:2. (b) dopamine:PPys = 1:1. (c) dopamine:PPys = 3:1. (d) dopamine:PPys = 5:1.

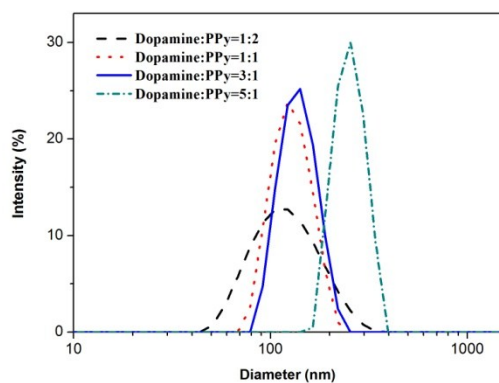

Fig. S2 Hydrodynamic size of different PPDE measured by dynamic light scattering (DLS) analysis.

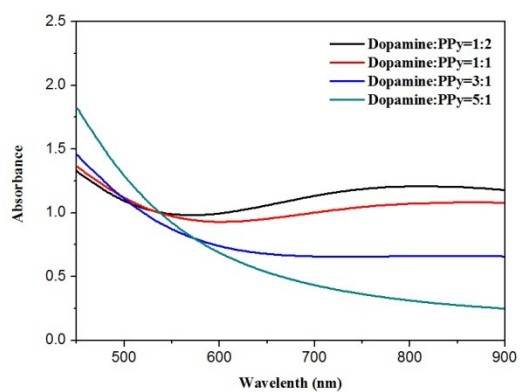

Fig. S3 Relevant UV-vis absorbance spectra of PPDE synthesized with different conditions, there were measured in the same concentration ( $30 \mu\text{g mL}^{-1}$ ).

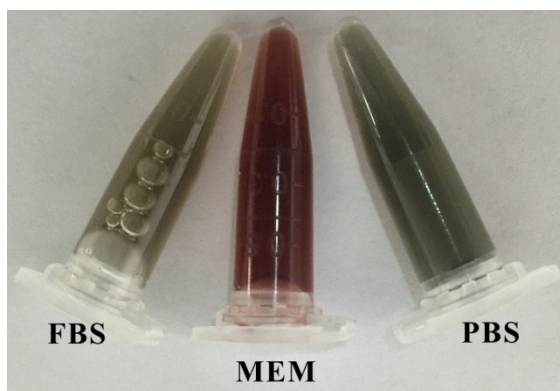

Fig. S4 Digital image of PPDE-3 dispersed in FBS, MEM and PBS for a month stored at  $4 \text{ }^\circ\text{C}$ .

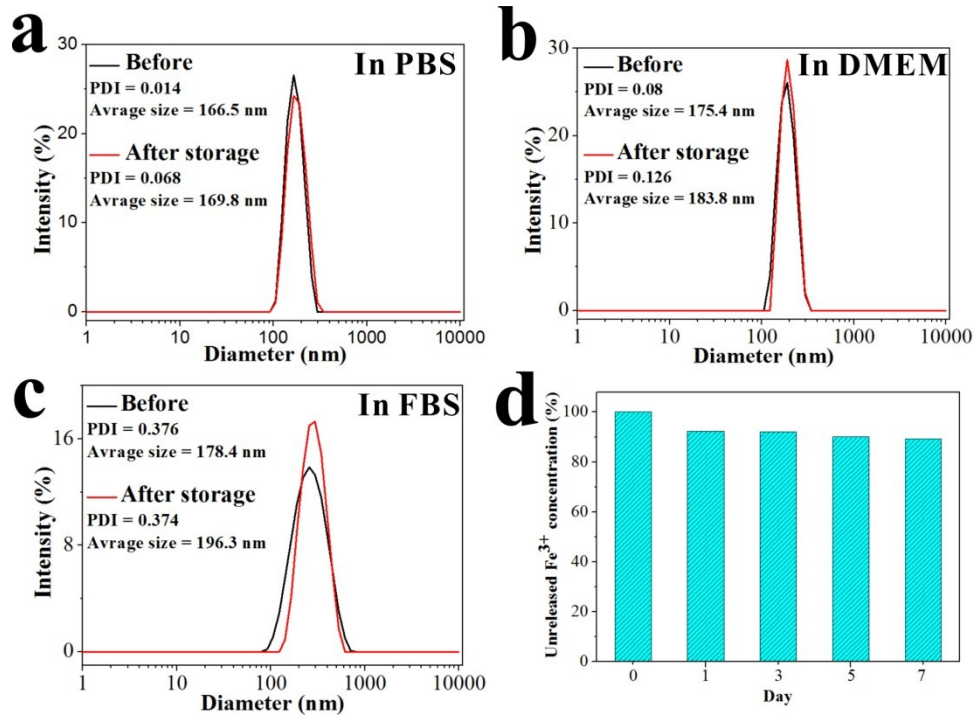

Fig. S5 DLS analysis of PPDE-3 before and after the storage in PBS (a), DMED (b) and FBS (c) for a month. (d) Stability study of Fe<sup>3+</sup> in the PPDE-3 in PBS (PH = 7.4, 37 °C).

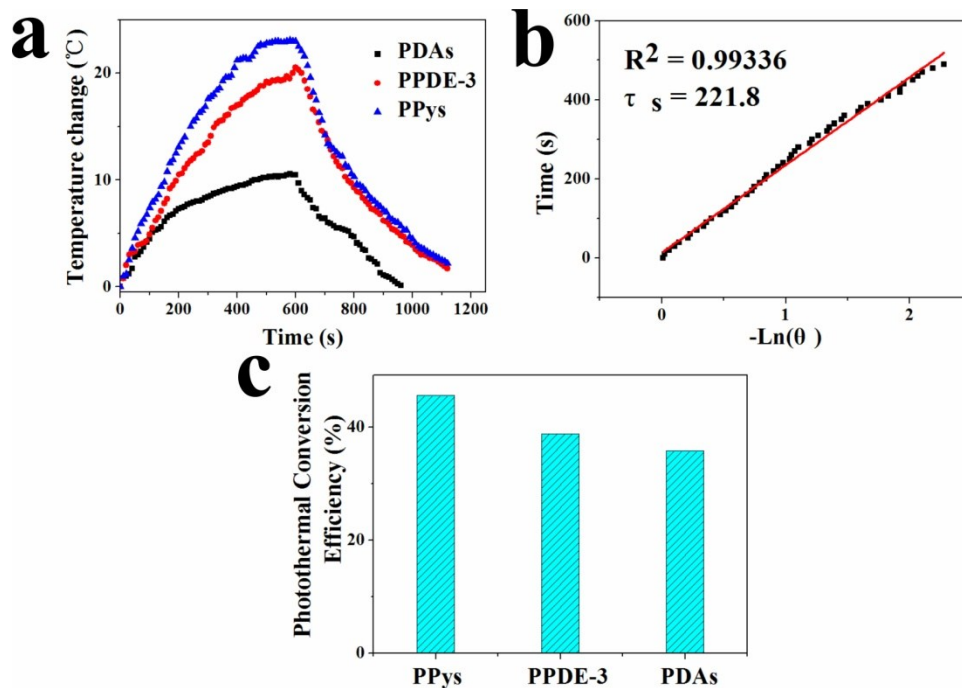

Fig. S6 (a) Temperature elevation of PPDE-3, PDAs and PPys suspensions with the same concentration (20  $\mu\text{g mL}^{-1}$ ) under NIR laser (808 nm, 1 W  $\text{cm}^{-2}$ ). (b) Linear time data versus  $-\ln\theta$  obtained from the cooling period of Fig. S6 (a). (c) Photothermal conversion efficiencies of PPDE-3 and PDA.

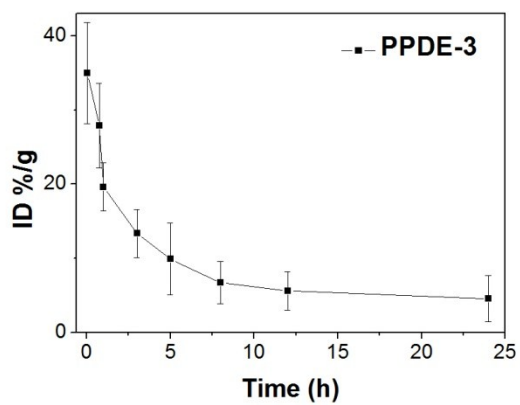

Fig. S7 Blood circulation of PPDE-3 as determined by measuring  $\text{Fe}^{3+}$  levels with ICP-AES.
